# Supplementary material for: Age-related demethylation of the TDP-43 autoregulatory region in the human motor cortex
Source: PubMed Central journal article supplement (PMC8455575; doi:10.1038/s42003-021-02621-0), 2021-09-21
Supplement: 42003_2021_2621_MOESM3_ESM.pdf [file 42003_2021_2621_MOESM3_ESM.pdf]

## Description of Additional Supplementary Files

**File name:** Supplementary Data 1.

**Description:** Summarized excel file containing the original information for all experiment-based figures and supplementary figures in this paper.
